# Supplementary material for: Multilevel drivers of digital transformation in long-term elderly care services: evidence from the Qinghai-Tibet Plateau, a high-altitude and resource-limited region of China
Source: Research Square preprint supplement (doi:10.21203/rs.3.rs-8152985/v1), 2026-01-09
Supplement: Supplementary file 1 [file f02ea3421baab0a6ac02cab1.docx]

**Supplementary Appendix S1.**

Survey questionnaire on drivers for the digital transformation of long-term elderly care services in the Qinghai-Tibet Plateau.

Dear expert,

Thank you for participating in this survey. The purpose of this questionnaire is to scientifically assess the relationships among the drivers for the digital transformation of long-term elderly care services in the Qinghai-Tibet Plateau. Based on your professional knowledge and experience, please evaluate the extent to which each driver influences the others. Use a scale of 0-4 to indicate the strength of influence, where: 0 = no influence, 1 = weak influence, 2 = moderate influence, 3 = strong influence, 4 = very strong influence.

Before completing the questionnaire, please read the following instructions carefully:

In the table below, the rows represent the "influencing drivers," while the columns represent the "influenced drivers." For example, if you believe that T1 (information technology infrastructure) has a strong direct influence on T2 (relative advantage), please mark "3" in the cell corresponding to row T1 and column T2.

The questionnaire involves some symbols. The symbol description is as follows.

| Dimensions | Drivers | Notation | Description |
| --- | --- | --- | --- |
| Technology (T) | Information technology infrastructure | T1 | The hardware, software, and network foundations required to support the digital transformation of elderly care services. |
| Relative advantage | T2 | The potential benefits of digital technologies compared with traditional service models in terms of efficiency, cost, or quality. |
| Compatibility | T3 | The degree to which digital technologies fit with the existing service processes, management models, and cultural environment of elderly care institutions. |
| Perceived ease of use | T4 | The simplicity of design and operation of digital technologies. |
| Security | T5 | The reliability of digital technologies in terms of data protection and system stability. |
| Organization (O) | Top management support | O1 | The extent of resources and encouragement provided by senior managers for digital transformation. |
| Financial resource capacity | O2 | The financial ability of institutions to procure, maintain, and operate digital technologies. |
| Human resource condition | O3 | The professional skills of existing staff in mastering digital elderly care services. |
| Information technology capability | O4 | The institution's ability to manage and maintain digital systems. |
| Organizational size | O5 | The scale of the institution in terms of service capacity and number of employees. |
| Environment (E) | Policy support | E1 | The extent of government promotion of digital transformation through policies and resource allocation. |
| Service demand | E2 | The perceived intensity of demand for digital services from elderly users and their families. |
| Competitive pressure | E3 | The external pressure exerted on institutions by competitors adopting digital transformation. |
| Economic development level | E4 | The economic conditions and level of development in the region where the institution is located. |
| Laws and standards | E5 | The guiding and constraining roles of laws, regulations, and industry standards on digital elderly care services. |
| Individual (I) | Performance expectancy | I1 | The degree to which staff expect digital technologies to improve their work performance. |
| Effort expectancy | I2 | The degree of effort required for staff to learn and use digital technologies. |
| Social influence | I3 | The influence of colleagues, supervisors, and the work environment on staff adoption of digital technologies. |

Please fill in the following questionnaire according to the instructions.

| Drivers | T1 | T2 | T3 | T4 | T5 | O1 | O2 | O3 | O4 | O5 | E1 | E2 | E3 | E4 | E5 | I1 | I2 | I3 |
| --- | --- | --- | --- | --- | --- | --- | --- | --- | --- | --- | --- | --- | --- | --- | --- | --- | --- | --- |
| T1 | — |  |  |  |  |  |  |  |  |  |  |  |  |  |  |  |  |  |
| T2 |  | — |  |  |  |  |  |  |  |  |  |  |  |  |  |  |  |  |
| T3 |  |  | — |  |  |  |  |  |  |  |  |  |  |  |  |  |  |  |
| T4 |  |  |  | — |  |  |  |  |  |  |  |  |  |  |  |  |  |  |
| T5 |  |  |  |  | — |  |  |  |  |  |  |  |  |  |  |  |  |  |
| O1 |  |  |  |  |  | — |  |  |  |  |  |  |  |  |  |  |  |  |
| O2 |  |  |  |  |  |  | — |  |  |  |  |  |  |  |  |  |  |  |
| O3 |  |  |  |  |  |  |  | — |  |  |  |  |  |  |  |  |  |  |
| O4 |  |  |  |  |  |  |  |  | — |  |  |  |  |  |  |  |  |  |
| O5 |  |  |  |  |  |  |  |  |  | — |  |  |  |  |  |  |  |  |
| E1 |  |  |  |  |  |  |  |  |  |  | — |  |  |  |  |  |  |  |
| E2 |  |  |  |  |  |  |  |  |  |  |  | — |  |  |  |  |  |  |
| E3 |  |  |  |  |  |  |  |  |  |  |  |  | — |  |  |  |  |  |
| E4 |  |  |  |  |  |  |  |  |  |  |  |  |  | — |  |  |  |  |
| E5 |  |  |  |  |  |  |  |  |  |  |  |  |  |  | — |  |  |  |
| I1 |  |  |  |  |  |  |  |  |  |  |  |  |  |  |  | — |  |  |
| I2 |  |  |  |  |  |  |  |  |  |  |  |  |  |  |  |  | — |  |
| I3 |  |  |  |  |  |  |  |  |  |  |  |  |  |  |  |  |  | — |

**Supplementary Appendix S2.**

Search strategy and inclusion criteria for literature retrieval.

| Database | Search terms | Inclusion Criteria |
| --- | --- | --- |
| Web of Science | ("smart elderly care" OR "intelligent elderly care" OR "smart aging" OR "digital elderly care" OR "smart senior care" OR "smart eldercare" OR "smart elderly services "OR "elderly care digitalization") AND ("driving factors" OR "drivers" OR "influencing factors" OR "critical factors" OR "determinants" OR "enablers" OR "motivation factors") | Document type: Article and Review; Indexes included: SSCI and SCIE Core Collection |
| Scopus | Document type: Article and Review; Subject areas: Social Sciences, Computer Science and Engineering |
| CNKI | （智慧养老 OR 智慧化养老 OR 智能养老 OR 智能化养老 OR 数字化养老 OR 养老服务智慧化 OR 智慧养老服务）AND（驱动因素 OR 影响因素 OR 关键因素 OR 动因 OR 推动因素 OR 驱动力 OR 促进因素 OR 驱动机制） | Document type: Journal articles and Master's/Doctoral dissertations; Journal source categories: CSSCI and CSCD |

**Supplementary Table S1.**

Direct influence matrix of drivers in the DEMATEL analysis.

| Drivers | T1 | T2 | T3 | T4 | T5 | O1 | O2 | O3 | O4 | O5 | E1 | E2 | E3 | E4 | E5 | I1 | I2 | I3 |
| --- | --- | --- | --- | --- | --- | --- | --- | --- | --- | --- | --- | --- | --- | --- | --- | --- | --- | --- |
| T1 | 0.00 | 3.25 | 2.67 | 3.00 | 3.17 | 2.08 | 2.58 | 1.75 | 2.75 | 1.75 | 1.75 | 2.25 | 1.08 | 2.25 | 1.58 | 2.25 | 2.00 | 1.92 |
| T2 | 2.67 | 0.00 | 2.67 | 2.58 | 2.75 | 3.33 | 2.58 | 2.00 | 2.17 | 1.58 | 3.17 | 2.67 | 2.33 | 1.92 | 1.33 | 3.33 | 2.58 | 2.67 |
| T3 | 2.75 | 3.25 | 0.00 | 2.75 | 2.17 | 2.83 | 2.08 | 2.00 | 2.42 | 2.00 | 2.83 | 2.33 | 1.75 | 1.75 | 1.50 | 2.33 | 2.67 | 2.25 |
| T4 | 2.75 | 3.17 | 3.00 | 0.00 | 2.33 | 3.25 | 2.00 | 2.17 | 2.92 | 1.58 | 2.50 | 3.17 | 1.83 | 1.67 | 1.50 | 2.83 | 3.00 | 2.42 |
| T5 | 3.00 | 3.17 | 2.58 | 2.67 | 0.00 | 3.42 | 2.58 | 2.25 | 2.83 | 1.25 | 3.08 | 2.92 | 1.92 | 1.42 | 3.00 | 2.33 | 2.25 | 2.25 |
| O1 | 3.25 | 1.83 | 1.75 | 1.50 | 2.00 | 0.00 | 3.67 | 3.17 | 3.17 | 2.17 | 2.17 | 1.58 | 1.75 | 1.67 | 1.92 | 2.75 | 2.67 | 3.17 |
| O2 | 3.58 | 2.42 | 2.33 | 1.67 | 2.33 | 3.25 | 0.00 | 3.00 | 3.25 | 2.58 | 1.67 | 1.17 | 1.42 | 1.83 | 1.17 | 1.67 | 2.00 | 2.00 |
| O3 | 1.67 | 2.17 | 2.08 | 2.42 | 1.92 | 2.42 | 2.08 | 0.00 | 3.33 | 1.50 | 1.67 | 1.75 | 1.67 | 1.92 | 1.33 | 2.67 | 2.83 | 2.50 |
| O4 | 2.75 | 2.83 | 2.75 | 3.08 | 3.08 | 2.75 | 2.25 | 2.67 | 0.00 | 1.33 | 1.92 | 2.08 | 2.00 | 1.67 | 1.50 | 2.33 | 2.83 | 2.33 |
| O5 | 2.42 | 1.50 | 1.83 | 1.58 | 1.75 | 2.92 | 2.67 | 2.50 | 2.50 | 0.00 | 1.92 | 2.17 | 2.50 | 1.67 | 1.42 | 2.33 | 2.25 | 2.25 |
| E1 | 3.83 | 2.58 | 2.58 | 1.92 | 2.75 | 3.75 | 3.58 | 3.25 | 3.00 | 2.08 | 0.00 | 1.92 | 2.67 | 2.42 | 3.58 | 2.75 | 2.50 | 3.33 |
| E2 | 2.83 | 2.00 | 1.92 | 2.08 | 2.08 | 3.50 | 2.17 | 2.08 | 2.00 | 1.50 | 3.08 | 0.00 | 2.83 | 1.92 | 2.50 | 2.33 | 2.17 | 2.25 |
| E3 | 2.33 | 1.92 | 2.00 | 2.17 | 2.25 | 2.83 | 2.08 | 2.17 | 2.17 | 1.75 | 2.00 | 1.42 | 0.00 | 1.92 | 1.83 | 2.08 | 2.08 | 2.67 |
| E4 | 3.67 | 2.25 | 2.25 | 2.00 | 2.33 | 3.58 | 4.00 | 3.17 | 3.08 | 2.92 | 3.00 | 2.92 | 2.50 | 0.00 | 2.58 | 2.75 | 2.42 | 2.50 |
| E5 | 2.83 | 1.92 | 2.33 | 1.92 | 3.75 | 3.08 | 2.42 | 2.67 | 2.67 | 1.58 | 2.92 | 1.67 | 1.75 | 1.50 | 0.00 | 1.75 | 1.83 | 2.00 |
| I1 | 2.42 | 2.50 | 2.33 | 2.50 | 2.33 | 2.50 | 1.83 | 2.42 | 2.58 | 1.67 | 1.92 | 2.08 | 2.00 | 1.67 | 1.58 | 0.00 | 3.08 | 2.75 |
| I2 | 1.92 | 1.83 | 1.75 | 2.58 | 2.17 | 2.33 | 2.08 | 2.58 | 2.42 | 1.58 | 1.75 | 2.17 | 1.67 | 1.58 | 1.50 | 3.33 | 0.00 | 2.92 |
| I3 | 2.42 | 2.08 | 2.00 | 2.17 | 2.25 | 3.00 | 2.00 | 2.33 | 2.42 | 1.58 | 2.00 | 2.25 | 1.92 | 1.75 | 1.83 | 2.67 | 2.83 | 0.00 |

**Supplementary Table S2.**

Normalized direct influence matrix.

| Drivers | T1 | T2 | T3 | T4 | T5 | O1 | O2 | O3 | O4 | O5 | E1 | E2 | E3 | E4 | E5 | I1 | I2 | I3 |
| --- | --- | --- | --- | --- | --- | --- | --- | --- | --- | --- | --- | --- | --- | --- | --- | --- | --- | --- |
| T1 | 0.000 | 0.067 | 0.055 | 0.062 | 0.065 | 0.043 | 0.053 | 0.036 | 0.057 | 0.036 | 0.036 | 0.046 | 0.022 | 0.046 | 0.033 | 0.046 | 0.041 | 0.040 |
| T2 | 0.055 | 0.000 | 0.055 | 0.053 | 0.057 | 0.069 | 0.053 | 0.041 | 0.045 | 0.033 | 0.065 | 0.055 | 0.048 | 0.040 | 0.027 | 0.069 | 0.053 | 0.055 |
| T3 | 0.057 | 0.067 | 0.000 | 0.057 | 0.045 | 0.058 | 0.043 | 0.041 | 0.050 | 0.041 | 0.058 | 0.048 | 0.036 | 0.036 | 0.031 | 0.048 | 0.055 | 0.046 |
| T4 | 0.057 | 0.065 | 0.062 | 0.000 | 0.048 | 0.067 | 0.041 | 0.045 | 0.060 | 0.033 | 0.052 | 0.065 | 0.038 | 0.034 | 0.031 | 0.058 | 0.062 | 0.050 |
| T5 | 0.062 | 0.065 | 0.053 | 0.055 | 0.000 | 0.071 | 0.053 | 0.046 | 0.058 | 0.026 | 0.064 | 0.060 | 0.040 | 0.029 | 0.062 | 0.048 | 0.046 | 0.046 |
| O1 | 0.067 | 0.038 | 0.036 | 0.031 | 0.041 | 0.000 | 0.076 | 0.065 | 0.065 | 0.045 | 0.045 | 0.033 | 0.036 | 0.034 | 0.040 | 0.057 | 0.055 | 0.065 |
| O2 | 0.074 | 0.050 | 0.048 | 0.034 | 0.048 | 0.067 | 0.000 | 0.062 | 0.067 | 0.053 | 0.034 | 0.024 | 0.029 | 0.038 | 0.024 | 0.034 | 0.041 | 0.041 |
| O3 | 0.034 | 0.045 | 0.043 | 0.050 | 0.040 | 0.050 | 0.043 | 0.000 | 0.069 | 0.031 | 0.034 | 0.036 | 0.034 | 0.040 | 0.027 | 0.055 | 0.058 | 0.052 |
| O4 | 0.057 | 0.058 | 0.057 | 0.064 | 0.064 | 0.057 | 0.046 | 0.055 | 0.000 | 0.027 | 0.040 | 0.043 | 0.041 | 0.034 | 0.031 | 0.048 | 0.058 | 0.048 |
| O5 | 0.050 | 0.031 | 0.038 | 0.033 | 0.036 | 0.060 | 0.055 | 0.052 | 0.052 | 0.000 | 0.040 | 0.045 | 0.052 | 0.034 | 0.029 | 0.048 | 0.046 | 0.046 |
| E1 | 0.079 | 0.053 | 0.053 | 0.040 | 0.057 | 0.077 | 0.074 | 0.067 | 0.062 | 0.043 | 0.000 | 0.040 | 0.055 | 0.050 | 0.074 | 0.057 | 0.052 | 0.069 |
| E2 | 0.058 | 0.041 | 0.040 | 0.043 | 0.043 | 0.072 | 0.045 | 0.043 | 0.041 | 0.031 | 0.064 | 0.000 | 0.058 | 0.040 | 0.052 | 0.048 | 0.045 | 0.046 |
| E3 | 0.048 | 0.040 | 0.041 | 0.045 | 0.046 | 0.058 | 0.043 | 0.045 | 0.045 | 0.036 | 0.041 | 0.029 | 0.000 | 0.040 | 0.038 | 0.043 | 0.043 | 0.055 |
| E4 | 0.076 | 0.046 | 0.046 | 0.041 | 0.048 | 0.074 | 0.082 | 0.065 | 0.064 | 0.060 | 0.062 | 0.060 | 0.052 | 0.000 | 0.053 | 0.057 | 0.050 | 0.052 |
| E5 | 0.058 | 0.040 | 0.048 | 0.040 | 0.077 | 0.064 | 0.050 | 0.055 | 0.055 | 0.033 | 0.060 | 0.034 | 0.036 | 0.031 | 0.000 | 0.036 | 0.038 | 0.041 |
| I1 | 0.050 | 0.052 | 0.048 | 0.052 | 0.048 | 0.052 | 0.038 | 0.050 | 0.053 | 0.034 | 0.040 | 0.043 | 0.041 | 0.034 | 0.033 | 0.000 | 0.064 | 0.057 |
| I2 | 0.040 | 0.038 | 0.036 | 0.053 | 0.045 | 0.048 | 0.043 | 0.053 | 0.050 | 0.033 | 0.036 | 0.045 | 0.034 | 0.033 | 0.031 | 0.069 | 0.000 | 0.060 |
| I3 | 0.050 | 0.043 | 0.041 | 0.045 | 0.046 | 0.062 | 0.041 | 0.048 | 0.050 | 0.033 | 0.041 | 0.046 | 0.040 | 0.036 | 0.038 | 0.055 | 0.058 | 0.000 |

**Supplementary Table S3.**

Comprehensive influence matrix derived from the DEMATEL analysis.

| Drivers | T1 | T2 | T3 | T4 | T5 | O1 | O2 | O3 | O4 | O5 | E1 | E2 | E3 | E4 | E5 | I1 | I2 | I3 |
| --- | --- | --- | --- | --- | --- | --- | --- | --- | --- | --- | --- | --- | --- | --- | --- | --- | --- | --- |
| T1 | 0.238 | 0.273 | 0.252 | 0.258 | 0.272 | 0.296 | 0.267 | 0.249 | 0.286 | 0.190 | 0.234 | 0.232 | 0.192 | 0.202 | 0.193 | 0.261 | 0.255 | 0.253 |
| T2 | 0.314 | 0.231 | 0.271 | 0.269 | 0.285 | 0.344 | 0.289 | 0.276 | 0.299 | 0.203 | 0.280 | 0.257 | 0.233 | 0.212 | 0.205 | 0.304 | 0.288 | 0.290 |
| T3 | 0.300 | 0.280 | 0.206 | 0.260 | 0.261 | 0.318 | 0.265 | 0.261 | 0.288 | 0.201 | 0.261 | 0.239 | 0.211 | 0.198 | 0.197 | 0.271 | 0.275 | 0.268 |
| T4 | 0.313 | 0.290 | 0.276 | 0.218 | 0.276 | 0.340 | 0.276 | 0.277 | 0.310 | 0.202 | 0.266 | 0.265 | 0.222 | 0.206 | 0.207 | 0.293 | 0.294 | 0.283 |
| T5 | 0.324 | 0.295 | 0.273 | 0.274 | 0.236 | 0.350 | 0.292 | 0.283 | 0.314 | 0.199 | 0.282 | 0.265 | 0.228 | 0.205 | 0.239 | 0.288 | 0.284 | 0.285 |
| O1 | 0.309 | 0.253 | 0.241 | 0.236 | 0.258 | 0.262 | 0.294 | 0.284 | 0.303 | 0.204 | 0.247 | 0.224 | 0.210 | 0.197 | 0.204 | 0.278 | 0.275 | 0.284 |
| O2 | 0.300 | 0.251 | 0.239 | 0.227 | 0.250 | 0.309 | 0.210 | 0.266 | 0.289 | 0.202 | 0.225 | 0.205 | 0.193 | 0.189 | 0.180 | 0.244 | 0.249 | 0.248 |
| O3 | 0.256 | 0.239 | 0.227 | 0.234 | 0.235 | 0.285 | 0.243 | 0.201 | 0.282 | 0.176 | 0.219 | 0.210 | 0.193 | 0.185 | 0.178 | 0.256 | 0.257 | 0.251 |
| O4 | 0.301 | 0.274 | 0.261 | 0.268 | 0.280 | 0.319 | 0.269 | 0.275 | 0.243 | 0.189 | 0.246 | 0.236 | 0.217 | 0.198 | 0.198 | 0.273 | 0.280 | 0.271 |
| O5 | 0.270 | 0.226 | 0.222 | 0.218 | 0.232 | 0.295 | 0.255 | 0.250 | 0.267 | 0.146 | 0.223 | 0.217 | 0.208 | 0.181 | 0.180 | 0.249 | 0.246 | 0.246 |
| E1 | 0.370 | 0.311 | 0.298 | 0.285 | 0.317 | 0.388 | 0.339 | 0.330 | 0.348 | 0.235 | 0.247 | 0.269 | 0.263 | 0.244 | 0.270 | 0.323 | 0.316 | 0.332 |
| E2 | 0.299 | 0.253 | 0.241 | 0.244 | 0.257 | 0.327 | 0.265 | 0.261 | 0.278 | 0.190 | 0.263 | 0.190 | 0.229 | 0.200 | 0.215 | 0.268 | 0.262 | 0.265 |
| E3 | 0.267 | 0.233 | 0.225 | 0.228 | 0.241 | 0.292 | 0.243 | 0.243 | 0.259 | 0.180 | 0.224 | 0.202 | 0.158 | 0.185 | 0.187 | 0.243 | 0.242 | 0.253 |
| E4 | 0.364 | 0.302 | 0.289 | 0.284 | 0.306 | 0.382 | 0.344 | 0.326 | 0.347 | 0.250 | 0.302 | 0.285 | 0.258 | 0.194 | 0.249 | 0.320 | 0.312 | 0.314 |
| E5 | 0.296 | 0.250 | 0.247 | 0.239 | 0.286 | 0.316 | 0.266 | 0.269 | 0.287 | 0.189 | 0.257 | 0.221 | 0.206 | 0.189 | 0.164 | 0.254 | 0.253 | 0.257 |
| I1 | 0.283 | 0.257 | 0.243 | 0.247 | 0.255 | 0.300 | 0.250 | 0.260 | 0.281 | 0.187 | 0.235 | 0.226 | 0.208 | 0.189 | 0.191 | 0.216 | 0.274 | 0.267 |
| I2 | 0.261 | 0.233 | 0.222 | 0.238 | 0.241 | 0.284 | 0.244 | 0.252 | 0.266 | 0.178 | 0.221 | 0.218 | 0.193 | 0.180 | 0.182 | 0.269 | 0.203 | 0.260 |
| I3 | 0.279 | 0.245 | 0.233 | 0.237 | 0.250 | 0.306 | 0.250 | 0.255 | 0.274 | 0.183 | 0.233 | 0.226 | 0.204 | 0.188 | 0.194 | 0.264 | 0.265 | 0.210 |

**Supplementary Table S4.**

Overall influence matrix used for ISM computation.

| Drivers | T1 | T2 | T3 | T4 | T5 | O1 | O2 | O3 | O4 | O5 | E1 | E2 | E3 | E4 | E5 | I1 | I2 | I3 |
| --- | --- | --- | --- | --- | --- | --- | --- | --- | --- | --- | --- | --- | --- | --- | --- | --- | --- | --- |
| T1 | 1.238 | 0.273 | 0.252 | 0.258 | 0.272 | 0.296 | 0.267 | 0.249 | 0.286 | 0.190 | 0.234 | 0.232 | 0.192 | 0.202 | 0.193 | 0.261 | 0.255 | 0.253 |
| T2 | 0.314 | 1.231 | 0.271 | 0.269 | 0.285 | 0.344 | 0.289 | 0.276 | 0.299 | 0.203 | 0.280 | 0.257 | 0.233 | 0.212 | 0.205 | 0.304 | 0.288 | 0.290 |
| T3 | 0.300 | 0.280 | 1.206 | 0.260 | 0.261 | 0.318 | 0.265 | 0.261 | 0.288 | 0.201 | 0.261 | 0.239 | 0.211 | 0.198 | 0.197 | 0.271 | 0.275 | 0.268 |
| T4 | 0.313 | 0.290 | 0.276 | 1.218 | 0.276 | 0.340 | 0.276 | 0.277 | 0.310 | 0.202 | 0.266 | 0.265 | 0.222 | 0.206 | 0.207 | 0.293 | 0.294 | 0.283 |
| T5 | 0.324 | 0.295 | 0.273 | 0.274 | 1.236 | 0.350 | 0.292 | 0.283 | 0.314 | 0.199 | 0.282 | 0.265 | 0.228 | 0.205 | 0.239 | 0.288 | 0.284 | 0.285 |
| O1 | 0.309 | 0.253 | 0.241 | 0.236 | 0.258 | 1.262 | 0.294 | 0.284 | 0.303 | 0.204 | 0.247 | 0.224 | 0.210 | 0.197 | 0.204 | 0.278 | 0.275 | 0.284 |
| O2 | 0.300 | 0.251 | 0.239 | 0.227 | 0.250 | 0.309 | 1.210 | 0.266 | 0.289 | 0.202 | 0.225 | 0.205 | 0.193 | 0.189 | 0.180 | 0.244 | 0.249 | 0.248 |
| O3 | 0.256 | 0.239 | 0.227 | 0.234 | 0.235 | 0.285 | 0.243 | 1.201 | 0.282 | 0.176 | 0.219 | 0.210 | 0.193 | 0.185 | 0.178 | 0.256 | 0.257 | 0.251 |
| O4 | 0.301 | 0.274 | 0.261 | 0.268 | 0.280 | 0.319 | 0.269 | 0.275 | 1.243 | 0.189 | 0.246 | 0.236 | 0.217 | 0.198 | 0.198 | 0.273 | 0.280 | 0.271 |
| O5 | 0.270 | 0.226 | 0.222 | 0.218 | 0.232 | 0.295 | 0.255 | 0.250 | 0.267 | 1.146 | 0.223 | 0.217 | 0.208 | 0.181 | 0.180 | 0.249 | 0.246 | 0.246 |
| E1 | 0.370 | 0.311 | 0.298 | 0.285 | 0.317 | 0.388 | 0.339 | 0.330 | 0.348 | 0.235 | 1.247 | 0.269 | 0.263 | 0.244 | 0.270 | 0.323 | 0.316 | 0.332 |
| E2 | 0.299 | 0.253 | 0.241 | 0.244 | 0.257 | 0.327 | 0.265 | 0.261 | 0.278 | 0.190 | 0.263 | 1.190 | 0.229 | 0.200 | 0.215 | 0.268 | 0.262 | 0.265 |
| E3 | 0.267 | 0.233 | 0.225 | 0.228 | 0.241 | 0.292 | 0.243 | 0.243 | 0.259 | 0.180 | 0.224 | 0.202 | 1.158 | 0.185 | 0.187 | 0.243 | 0.242 | 0.253 |
| E4 | 0.364 | 0.302 | 0.289 | 0.284 | 0.306 | 0.382 | 0.344 | 0.326 | 0.347 | 0.250 | 0.302 | 0.285 | 0.258 | 1.194 | 0.249 | 0.320 | 0.312 | 0.314 |
| E5 | 0.296 | 0.250 | 0.247 | 0.239 | 0.286 | 0.316 | 0.266 | 0.269 | 0.287 | 0.189 | 0.257 | 0.221 | 0.206 | 0.189 | 1.164 | 0.254 | 0.253 | 0.257 |
| I1 | 0.283 | 0.257 | 0.243 | 0.247 | 0.255 | 0.300 | 0.250 | 0.260 | 0.281 | 0.187 | 0.235 | 0.226 | 0.208 | 0.189 | 0.191 | 1.216 | 0.274 | 0.267 |
| I2 | 0.261 | 0.233 | 0.222 | 0.238 | 0.241 | 0.284 | 0.244 | 0.252 | 0.266 | 0.178 | 0.221 | 0.218 | 0.193 | 0.180 | 0.182 | 0.269 | 1.203 | 0.260 |
| I3 | 0.279 | 0.245 | 0.233 | 0.237 | 0.250 | 0.306 | 0.250 | 0.255 | 0.274 | 0.183 | 0.233 | 0.226 | 0.204 | 0.188 | 0.194 | 0.264 | 0.265 | 1.210 |

**Supplementary Table S5.**

Final reachability matrix for ISM analysis.

| Drivers | T1 | T2 | T3 | T4 | T5 | O1 | O2 | O3 | O4 | O5 | E1 | E2 | E3 | E4 | E5 | I1 | I2 | I3 | Driving power |
| --- | --- | --- | --- | --- | --- | --- | --- | --- | --- | --- | --- | --- | --- | --- | --- | --- | --- | --- | --- |
| T1 | 1 | 0 | 0 | 0 | 0 | 1 | 0 | 0 | 1 | 0 | 0 | 0 | 0 | 0 | 0 | 0 | 0 | 0 | 3 |
| T2 | 1 | 1 | 0 | 0 | 0 | 1 | 0 | 0 | 1 | 0 | 0 | 0 | 0 | 0 | 0 | 1 | 0 | 0 | 5 |
| T3 | 1 | 0 | 1 | 0 | 0 | 1 | 0 | 0 | 1 | 0 | 0 | 0 | 0 | 0 | 0 | 0 | 0 | 0 | 4 |
| T4 | 1 | 0 | 0 | 1 | 0 | 1 | 0 | 0 | 1 | 0 | 0 | 0 | 0 | 0 | 0 | 0 | 0 | 0 | 4 |
| T5 | 1 | 0 | 0 | 0 | 1 | 1 | 0 | 0 | 1 | 0 | 0 | 0 | 0 | 0 | 0 | 0 | 0 | 0 | 4 |
| O1 | 1 | 0 | 0 | 0 | 0 | 1 | 0 | 0 | 1 | 0 | 0 | 0 | 0 | 0 | 0 | 0 | 0 | 0 | 3 |
| O2 | 1 | 0 | 0 | 0 | 0 | 1 | 1 | 0 | 1 | 0 | 0 | 0 | 0 | 0 | 0 | 0 | 0 | 0 | 4 |
| O3 | 0 | 0 | 0 | 0 | 0 | 0 | 0 | 1 | 0 | 0 | 0 | 0 | 0 | 0 | 0 | 0 | 0 | 0 | 1 |
| O4 | 1 | 0 | 0 | 0 | 0 | 1 | 0 | 0 | 1 | 0 | 0 | 0 | 0 | 0 | 0 | 0 | 0 | 0 | 3 |
| O5 | 0 | 0 | 0 | 0 | 0 | 0 | 0 | 0 | 0 | 1 | 0 | 0 | 0 | 0 | 0 | 0 | 0 | 0 | 1 |
| E1 | 1 | 1 | 1 | 0 | 1 | 1 | 1 | 1 | 1 | 0 | 1 | 0 | 0 | 0 | 0 | 1 | 1 | 1 | 12 |
| E2 | 1 | 0 | 0 | 0 | 0 | 1 | 0 | 0 | 1 | 0 | 0 | 1 | 0 | 0 | 0 | 0 | 0 | 0 | 4 |
| E3 | 0 | 0 | 0 | 0 | 0 | 0 | 0 | 0 | 0 | 0 | 0 | 0 | 1 | 0 | 0 | 0 | 0 | 0 | 1 |
| E4 | 1 | 1 | 1 | 0 | 1 | 1 | 1 | 1 | 1 | 0 | 1 | 0 | 0 | 1 | 0 | 1 | 1 | 1 | 13 |
| E5 | 1 | 0 | 0 | 0 | 0 | 1 | 0 | 0 | 1 | 0 | 0 | 0 | 0 | 0 | 1 | 0 | 0 | 0 | 4 |
| I1 | 1 | 0 | 0 | 0 | 0 | 1 | 0 | 0 | 1 | 0 | 0 | 0 | 0 | 0 | 0 | 1 | 0 | 0 | 4 |
| I2 | 0 | 0 | 0 | 0 | 0 | 0 | 0 | 0 | 0 | 0 | 0 | 0 | 0 | 0 | 0 | 0 | 1 | 0 | 1 |
| I3 | 1 | 0 | 0 | 0 | 0 | 1 | 0 | 0 | 1 | 0 | 0 | 0 | 0 | 0 | 0 | 0 | 0 | 1 | 4 |
| Dependence power | 14 | 3 | 3 | 1 | 3 | 14 | 3 | 3 | 14 | 1 | 2 | 1 | 1 | 1 | 1 | 4 | 3 | 3 |  |

**Supplementary Table S6.**

Iterative results of level partitioning for ISM divers.

| Iteration stage | Drivers | Reachability set | | | | Antecedent set | | | Interaction set | | | | | | Level | | | |
| --- | --- | --- | --- | --- | --- | --- | --- | --- | --- | --- | --- | --- | --- | --- | --- | --- | --- | --- |
| First iteration | T1 | T1, O1, O4 | | | | T1, T2, T3, T4, T5, O1, O2, O4, E1, E2, E4, E5, I1, I3 | | | T1, O1, O4 | | | | | | 1 | | | |
| T2 | T1, T2, O1, O4, I1 | | | | T2, E1, E4 | | | T2 | | | | | |  | | | |
| T3 | T1, T3, O1, O4 | | | | T3, E1, E4 | | | T3 | | | | | |  | | | |
| T4 | T1, T4, O1, O4 | | | | T4 | | | T4 | | | | | |  | | | |
| T5 | T1, T5, O1, O4 | | | | T5, E1, E4 | | | T5 | | | | | |  | | | |
| O1 | T1, O1, O4 | | | | T1, T2, T3, T4, T5, O1, O2, O4, E1, E2, E4, E5, I1, I3 | | | T1, O1, O4 | | | | | | 1 | | | |
| O2 | T1, O1, O2, O4 | | | | O2, E1, E4 | | | O2 | | | | | |  | | | |
| O3 | O3 | | | | O3, E1, E4 | | | O3 | | | | | | 1 | | | |
| O4 | T1, O1, O4 | | | | T1, T2, T3, T4, T5, O1, O2, O4, E1, E2, E4, E5, I1, I3 | | | T1, O1, O4 | | | | | | 1 | | | |
| O5 | O5 | | | | O5 | | | O5 | | | | | | 1 | | | |
| E1 | T1, T2, T3, T5, O1, O2, O3, O4, E1, I1, I2, I3 | | | | E1, E4 | | | E1 | | | | | |  | | | |
| E2 | T1, O1, O4, E2 | | | | E2 | | | E2 | | | | | |  | | | |
| E3 | E3 | | | | E3 | | | E3 | | | | | | 1 | | | |
| E4 | T1, T2, T3, T5, O1, O2, O3, O4, E1, E4, I1, I2, I3 | | | | E4 | | | E4 | | | | | |  | | | |
| E5 | T1, O1, O4, E5 | | | | E5 | | | E5 | | | | | |  | | | |
| I1 | T1, O1, O4, I1 | | | | T2, E1, E4, I1 | | | I1 | | | | | |  | | | |
| I2 | I2 | | | | E1, E4, I2 | | | I2 | | | | | | 1 | | | |
| I3 | T1, O1, O4, I3 | | | | E1, E4, I3 | | | I3 | | | | | |  | | | |
| Second iteration | T2 | | T2, I1 | | | | T2, E1, E4 | | | T2 | | | |  | | | |
| T3 | | T3 | | | | T3, E1, E4 | | | T3 | | | | 2 | | | |
| T4 | | T4 | | | | T4 | | | T4 | | | | 2 | | | |
| T5 | | T5 | | | | T5, E1, E4 | | | T5 | | | | 2 | | | |
| O2 | | E2 | | | | O2, E1, E4 | | | O2 | | | | 2 | | | |
| E1 | | T2, T3, T5, O2, E1, I1, I3 | | | | E1, E4 | | | E1 | | | |  | | | |
| E2 | | E2 | | | | E2 | | | E2 | | | | 2 | | | |
| E4 | | T2, T3, T5, O2, E1, E4, I1, I3 | | | | E4 | | | E4 | | | |  | | | |
| E5 | | E5 | | | | E5 | | | E5 | | | | 2 | | | |
| I1 | | I1 | | | | T2, E1, E4, I1 | | | I1 | | | | 2 | | | |
| I3 | | I3 | | | | E1, E4, I3 | | | I3 | | | | 2 | | | |
| Third iteration | T2 | | | T2 | | T2, E1, E4 | | | | | T2 | | 3 | | | | |
| E1 | | | T2, E1 | | E1, E4 | | | | | E1 | |  | | | | |
| E4 | | | T2, E1, E4 | | E4 | | | | | E4 | |  | | | | |
| Fourth iteration | E1 | | | | E1 | | | E1, E4 | | | | E1 | | | | | 4 | | |
| E4 | | | | E1, E4 | | | E4 | | | | E4 | | | | |  | | |
| Fifth iteration | E4 | | | | E4 | | | E4 | | | | E4 | | | | 5 | | | |

The ISM level partitioning process was conducted iteratively until all divers were assigned to specific levels. The first iteration identified surface-level divers (Level 1), and subsequent iterations progressively revealed intermediate and deep-level divers, culminating in the fifth iteration, which determined the fundamental divers (Level 5).
